1 **Bowel Colonization by Non-Commensal Fungi in**  
2 **Neonatal Obstructive Cholangitis and Biliary Atresia**

3  
4 Song-Wei Huang<sup>1,†</sup>, M.Sc., Chia-Ray Lin<sup>2,†</sup>, Ph.D., Ya-Hui Chang<sup>1</sup>, M.Sc., Yen-Hsuan Ni<sup>2</sup>,  
5 M.D., Ph.D., Huey-Ling Chen<sup>2,\*</sup>, M.D., Ph.D., Hong-Hsing Liu<sup>1,3,\*</sup>, M.D., Ph.D.

6  
7 <sup>1</sup>Institute of Molecular and Genomic Medicine, National Health Research Institutes,  
8 Zhunan Town, Miaoli County 35053, Taiwan

9 <sup>2</sup>Pediatrics Department, National Taiwan University Children's Hospital, Taipei,  
10 100225, Taiwan

11 <sup>3</sup>Pediatrics, En Chu Kong Hospital, Sanxia District, New Taipei City 237414, Taiwan

12 †Equal contribution as first author

13 \*Equal contribution as senior author

14 Correspondence: [hhliu@nhri.edu.tw](mailto:hhliu@nhri.edu.tw); [honghsing.liu@gmail.com](mailto:honghsing.liu@gmail.com)

15

16

17 **Abstract**

18 Up to two-thirds of biliary atresia (BA) patients need liver transplantation after the  
19 standard Kasai portoenterostomy treatment. Unrelenting cholangitis often  
20 precedes the full-blown presentation of BA. Using ribosomal 18S sequencing, here  
21 we report bowel colonization by non-commensal *Aspergillus* fungi in one case of  
22 neonatal obstructive cholangitis. Continuous oral fluconazole treatment resolved  
23 obstructive cholangitis completely. Colonization by non-commensal *Aspergillus* and  
24 *Cerrena* were additionally identified in 2 BA cases. In brief, bowel colonization by  
25 non-commensal fungi could be a treatable cause of neonatal obstructive cholangitis  
26 and potentially BA at an early stage.  
27

## 28 **Introduction**

29 Inflammation of bile ducts or cholangitis in newborns is uncommon. However, it  
30 can be a devastating prelude to biliary atresia (BA), the pathologic condition of  
31 obliterated bile outlets. BA patients have characteristically low fecal bile pigments  
32 at disease onset, and eventually develop clay-colored stools. Kasai  
33 portoenterostomy, which surgically rechannels between interhepatic bile ducts and  
34 intestine, is currently the standard first-line treatment for BA[1]. However, up to  
35 two-thirds of patients will still require liver transplantation[2] due to unrelenting  
36 bile-duct obstruction and subsequent liver cirrhosis. The underlying cause for BA  
37 has remained unknown.

38 Here we describe a case of neonatal obstructive cholangitis associated with  
39 colonization by non-commensal *Aspergillus* fungi. Oral anti-fungal fluconazole  
40 successfully resolved cholangitis and normalized bilirubin levels. Drawing from  
41 these findings, we suspected that BA could share a similar pathogenic mechanism.  
42 Indeed, feces of two BA patients showed colonization by non-commensal *Cerrena*  
43 and *Aspergillus* fungi. Healthy controls showed colonization only by commensal  
44 fungi *Candida sp.* and *Malassezia furfur*.

45

## 46 **Methods**

### 47 **Human subjects**

48 Use of clinical samples and report of clinical data have been approved by the  
49 Institutional Review Boards of National Taiwan University Children's Hospital and En  
50 Chu Kong Hospital.

51

### 52 **Fecal DNA extraction**

53 Fecal samples from the index case were collected and stored at -80°C before use.  
54 DNA was extracted from 50-200mg stool using ZymoBIOMICS DNA Miniprep Kit  
55 (Zymo, D4300) according to manufacturer's protocols. Fecal DNA for BA cases and  
56 controls were extracted with QIAamp PowerFecal Pro DNA Kits.

57

### 58 **18S PCR and Sanger sequencing**

59 All polymerase chain reactions (PCR) were performed with KAPA HiFi HotStart  
60 ReadyMix PCR Kit (Roche, KK2602). For 18S V1-V8 PCR, DNA samples were run with  
61 primers 18S-F-bc1005C-P5 (5'-AATGATACGGCGACCACCGAGATCTACACGTGAG  
62 CTGAGAGCGACCATGCATGTCTAAGTWTAA -3') and 18S-R-bc1033C-P7 (5'- CAAGCAG  
63 AAGACGGCATA CGAGATTCTCTGACGCTGCTCTAICCATTCAATCGGTAIT -3'). PCR was  
64 performed on MiniAmp plus Thermal Cycler (Thermo Fisher Scientific, A37835) with  
65 the following conditions: 95°C 3m, 5 cycles of 98°C 30s + 54°C 30s + 72°C 1m30s, 5

66 cycles of 98°C 30s + 51°C 30s + 72°C 1m30s, 30 cycles of 98°C 30s + 48°C 30s + 72°C  
67 1m30s, and a final extension of 72°C 3m30s. Yeast cDNA and ddH<sub>2</sub>O were used as  
68 positive and negative controls, respectively. For semi-nested 18S V7-V8 PCR, the  
69 first V1-V8 PCR was performed as above except with the last 30 cycles before final  
70 extension reduced to 20 cycles. 1µl of V1-V8 PCR products was used to template  
71 each semi-nested V7-V8 PCR with primers 18S-F-nu-SSU-1333-5' (5'-  
72 CGWTAACGAACGAGACCT-3') and 18S-R-bc1033C-P7. Thermocycling conditions  
73 were 95°C 3m, 5 cycles of 98°C 30s + 54°C 30s + 72°C 1m, 5 cycles of 98°C 30s + 51°C  
74 30s + 72°C 1m, 20 cycles of 98°C 30s + 48°C 30s + 72°C 1m, and a final extension of  
75 72°C 3m30s. Semi-nested V7-V8 amplicons were purified with MinElute PCR  
76 Purification Kit (QIAGEN, #28006) before Sanger sequencing.

77

### 78 **16S PCR**

79 All 16S PCR were performed with KAPA HiFi HotStart ReadyMix PCR Kit (Roche,  
80 KK2602). V1-V9 regions were amplified with primers 16S-F-bc1005-P5  
81 (5'-AATGATACGGCGACCACCGAGATCTACCACTCGACTCTCGCGTAGRGTTYGATYMTGG  
82 CTCAG-3') and 16S-R-bc1033-P7  
83 (5'-CAAGCAGAAGACGGCATACTAGAGACTGCGACGAGARGYTACCTTGTACGACTT-  
84 3') using the following thermocycling conditions: 95 °C 3m, 27 cycles of 95°C 30s +  
85 57°C 30s + 72°C 1m, and a final extension of 72°C 3m. *E. coli* DH5α DNA and ddH<sub>2</sub>O  
86 were used as positive and negative controls, respectively.

87

### 88 **Bioinformatic analyses**

89 Sequences from Sanger sequencing were analyzed with SnapGene software  
90 ([www.snapgene.com](http://www.snapgene.com)). Nucleotide BLAST[3] was performed using the National  
91 Center for Biotechnology Information server.

92

## 93 **Results**

### 94 **Fungal cholangitis in a newborn**

95 A newborn male was delivered emergently by Caesarean section (C/S) due to fetal  
96 distress at 39 weeks of gestation. Cardiac arrest and thick meconium stains were  
97 noted. After successful resuscitation, the patient was sent to Neonatal Intensive  
98 Care Unit (NICU) for further management. Severe hypoglycemia (< 2 mg/dL) was  
99 detected at admission. Continuous supply of 10% glucose *via* peripheral lines  
100 barely maintained blood glucose levels. Without central lines, early oral feeding  
101 with 50% concentrated glucose water was begun one day after birth (D1) for one  
102 week. Insulin and cortisol responses were normal as evaluated on D3, and there  
103 was no evidence of inborn errors of metabolism. Vital signs were stable and no

104 neural sequelae were found. However, ileus with distended abdomen later  
105 complicated the course in spite of full antibiotic coverage. Severe  
106 thrombocytopenia with normal counts of white blood cells was noted (D8, D11,  
107 Figure 1A). Fungal infection was suspected, so intravenous (i.v.) fluconazole was  
108 administered from D11. Dramatic clinical improvement followed, and fluconazole  
109 was discontinued on D19. However, severe leukocytosis of 20,400/ $\mu$ L on D15 and  
110 28,300/ $\mu$ L on D19 required another empirical course of i.v. antibiotics (D19-D26), but  
111 in vain (D27, Figure 1A).

112 During this period direct-type hyperbilirubinemia with high  
113 gamma-glutamyltransferase ( $\gamma$ -GT) values (D27, Figure 1B) was preceded by  
114 clotrimazole-responsive perianal dermatophytosis (D23, Figure 1C) and light-colored  
115 stool (D26, Figure 1C). Under suspicion of fungal cholangitis, amphotericin B was  
116 administered from D27 to D29 (Figure 1B). Without improvement on bilirubin  
117 levels, anti-fungal medication was shifted to oral fluconazole from D30 (Figure 1B).  
118 Interestingly, stool color turned to yellow on the next day (D31, Figure 1C), with  
119 presentation improving in subsequent days (D38, Figure 1C). At the same time,  
120 hyperbilirubinemia subsided gradually (Figure 1B). Abdominal echo showed a  
121 well-distended gall bladder and no bile duct obstructions (D40, Figure 1C). The  
122 patient was discharged on D41, and kept on oral fluconazole. Follow-up blood cell  
123 counts, bilirubin levels, and  $\gamma$ -GT values were normal (Figures 1A and 1B). Daily oral  
124 fluconazole was tapered to three times weekly for two weeks, twice weekly for two  
125 weeks, and finally once weekly for one month. The patient developed and grew  
126 normally as far as the last clinical check at five months old. Fungal cultures of blood  
127 or stool collected during the patient's stay in the hospital all yielded negative results.

128

### 129 **Cholangitis associated with *Aspergillus sp.***

130 We used fungal-ribosomal 18S PCR[4-6] to characterize suspected fungal infection  
131 from fecal DNA. Bacterial 16S V1-V9 PCR[5] served as internal control (Figure 2A).  
132 One 18S V1-V8 band was clearly amplified from the D28 fecal sample (Figure 2A),  
133 though amphotericin B was given i.v. from D27 to D29 (Figure 1B). The V1-V8 band  
134 disappeared (D31, D38, Figure 2A) after oral administration of fluconazole from D30  
135 (Figure 1B). Products from 18S V1-V8 PCR were used to amplify the V7-V8 region  
136 for taxonomical classification through semi-nested PCR (red arrow, Figure 2A).  
137 Sequence results identified *Aspergillus sp.* by nucleotide BLAST[3] against the nr/nt  
138 database[7] (Figure 2B and Table 1).

139

### 140 **Non-commensal fungal colonization in biliary atresia**

141 *Aspergillus sp.* is not a usual fungal commensal of the gastrointestinal tract[8]. We

142 suspect that BA, a disease also characterized by bile-duct inflammation, could be  
143 related to colonization by unusual fungi in newborn bowels. We subjected fecal  
144 DNA from five cases of BA and four healthy controls to 18S V1-V8 and nested V7-V8  
145 PCR (Figure 2C). Four samples (BA-1, -3, -5 and control-3) yield positive results (red  
146 arrow, Figure 2C). Sequences from BA-1 are mapped to *Cerrena sp.* (Figure 2D and  
147 Table 1). *Aspergillus sp.* is also identified in BA-5 (Table 1). BA-3 and control-3 are  
148 related to *Candida* (Table 1). Of four additional control samples, three yield  
149 sequences from *Candida* and one has sequences from *Malassezia* (Table 1).  
150 Non-commensal fungi are not identified in any controls. The Fisher exact test  
151 statistic is 0.0476 (<0.05) between controls and patients who had molecular evidence  
152 of fungal colonization.

153

#### 154 **Distinct *Aspergillus sp.* between patients**

155 Both the cholangitis case and BA-5 are associated with bowel colonization by  
156 *Aspergillus sp.* (Table 1). We align 18S V7-V8 sequences to compare identities.  
157 We find that at least two loci have distinct T vs. C nucleotide polymorphisms (red  
158 arrow, Figure 2E). This result suggests that the two patients' bowels were colonized  
159 by different *Aspergillus*.

160

#### 161 **Discussion**

162 There have been no reports of neonatal fungal cholangitis in the literature. Before  
163 the onset of hyperbilirubinemia, the index case experienced a course of  
164 gastroenteritis which responded to fluconazole but not antibiotics. Prior week-long  
165 ingestion of concentrated glucose water *per os* could have contributed to fungal  
166 overgrowth. Notably, the patient suffered fetal distress before emergent C/S and  
167 had a glucose level undetectable at NICU admission. Congenital fungal infection  
168 could not be ruled out.

169 Immune mechanisms for occurrence of cholangitis are unclear. At the  
170 gastroenteritis stage platelet counts were very low, but at the cholangitis stage  
171 platelet counts were normal (Figure 1A). Underlying pathogeneses may differ.  
172 Fungi could cause immune overreaction at the cholangitis stage but direct invasion  
173 might dominate the gastroenteritis stage. These hypotheses might be tested once  
174 culture conditions for implicated fungi, especially *Aspergillus sp.* (Figure 2B), are  
175 established.

176 Drawing on these findings, we suspected BA could share a fungal pathogenic  
177 mechanism. Indeed, we found colonization by non-commensal fungi in two BA  
178 patients, but not in controls. 18S analyses revealed *Cerrena sp.* in BA-1 and  
179 *Aspergillus sp.* in BA-5 (Table 1). Neither *Cerrena sp.* nor *Aspergillus sp.* are

180 gastrointestinal commensals, though both are identifiable from human respiratory  
181 tracts[9]. These fungi might take advantage of compromised immunity in newborns  
182 to overgrow and overstimulate immature immune systems. One report describes a  
183 complicating *Aspergillus sp.* infection following Kasai portoenterostomy[10],  
184 supporting our observation of fungal overgrowth in BA patients. Though two BA  
185 cases lacked identifiable fungi, their immune systems could still have overreacted to  
186 low amounts of fungi in bowels. The index cholangitis case is an example.  
187 Although PCR did not detect fungi after fluconazole administration (D31, Figure 2A),  
188 white blood cell counts remained high for more than 10 days (Figure 1A). It is  
189 possible that trace fungal stimulants in bowels could have exponentially pathogenic  
190 effects under some circumstances.

191 The index case with cholangitis was successfully treated with oral fluconazole. If  
192 overgrowth and overstimulation by non-commensal fungi accounts for at least part  
193 of BA pathogenesis, early anti-fungal treatment among BA patients should be  
194 considered. Using current standard surgical interventions, two-thirds of patients  
195 still eventually require liver transplantation[2]. If BA clinical course can be  
196 significantly altered, benefits of anti-fungal treatment would clearly outweigh the  
197 small associated hepatitis risk[11].

198

### 199 **Acknowledgements**

200 We thank Dr. Mei-Hwei Chang for professional discussion and significant support.  
201 Dr. Shiu-Feng Huang's inputs are greatly appreciated. We thank Chih-Wei Joshua  
202 Liu (MIT Physics of Living Systems) for English editing.

203

### 204 **Author Contributions**

205 S.W.H., C.J.L., and Y.H.C. conducted and optimized experiments. Y.H.N. and H.L.C.  
206 contributed samples and helped elaborate the study. H.H.L. initiated the project  
207 and proposed the hypothesis.

208

### 209 **Competing Financial Interests**

210 The authors declare no conflict of interests.

211

212 **Table 1. Top two hits of nested 18S V7-V8 nucleotide BLAST.**

| Sample  | Age(mo) | Diagnosis   | Nested 18S V7-V8 BLAST hits*                                     | Note      |
|---------|---------|-------------|------------------------------------------------------------------|-----------|
| ECK-D28 | 0.9     | Cholangitis | <i>Aspergillus sp.</i> (98.73%); <i>Aspergillus sp.</i> (98.73%) | Figure 2A |
| ECK-D31 | 1.0     | Cholangitis | Not available                                                    | Figure 2A |

|           |     |                 |                                                                        |           |
|-----------|-----|-----------------|------------------------------------------------------------------------|-----------|
| ECK-D38   | 1.3 | Cholangitis     | Not available                                                          | Figure 2A |
| BA-1      | 1.7 | Biliary Atresia | <i>Cerrena sp.</i> (98.74%); <i>Cerrena sp.</i> (98.74%)               | Figure 2C |
| BA-2      | 1.1 | Biliary Atresia | Not available                                                          | Figure 2C |
| BA-3      | 2.4 | Biliary Atresia | Uncultured fungus (99.04%); <i>Candida parapsilosis</i> (99.04%)       | Figure 2C |
| BA-4      | 3.9 | Biliary Atresia | Not available                                                          | Figure 2C |
| BA-5      | 0.6 | Biliary Atresia | <i>Aspergillus sp.</i> (98.12%); <i>Aspergillus sp.</i> (98.12%)       | Figure 2C |
| Control-1 | 1.0 | Normal          | Not available                                                          | Figure 2C |
| Control-2 | 1.0 | Normal          | Not available                                                          | Figure 2C |
| Control-3 | 2.0 | Normal          | Uncultured fungus (98.40%); <i>Candida parapsilosis</i> (98.39%)       | Figure 2C |
| Control-4 | 2.0 | Normal          | Not available                                                          | Figure 2C |
| Control-5 | 1.0 | Normal          | <i>Candida albicans</i> (98.06%); <i>Candida albicans</i> (98.06%)     | Same baby |
| Control-6 | 2.0 | Normal          | <i>Candida albicans</i> (99.62%); <i>Candida albicans</i> (99.62%)     |           |
| Control-7 | 1.0 | Normal          | Uncultured fungus (99.60%); <i>Candida parapsilosis</i> (99.60%)       | Same baby |
| Control-8 | 2.0 | Normal          | <i>Malassezia furfur</i> (100.00%); <i>Malassezia furfur</i> (100.00%) |           |

213 \*First and second hits, respectively. Percent identities in parentheses.

214

215

216



217 **Figures**

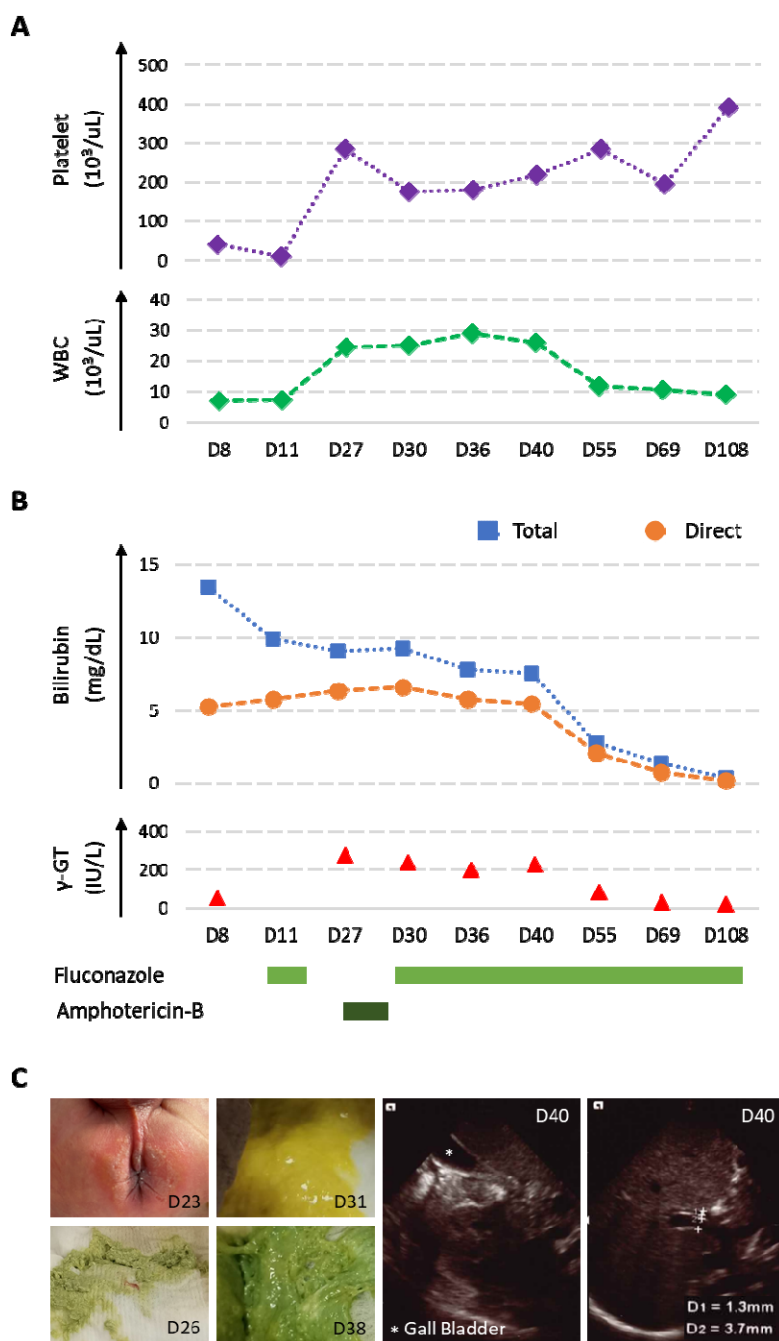

218

219 **Figure 1.** Clinical presentation of the cholangitis case. A. Profiles of platelets and  
 220 white blood cell counts are distinct between early gastroenteritis stage and late  
 221 cholangitis stage. B. Blood bilirubin levels and  $\gamma$ -GT values decrease following  
 222 fluconazole treatment. C. Perianal dermatophytosis is consistent with fungal  
 223 colonization in stool. A series of stool phenotypes and abdominal ultrasonographs  
 224 show resolution of cholangitis.

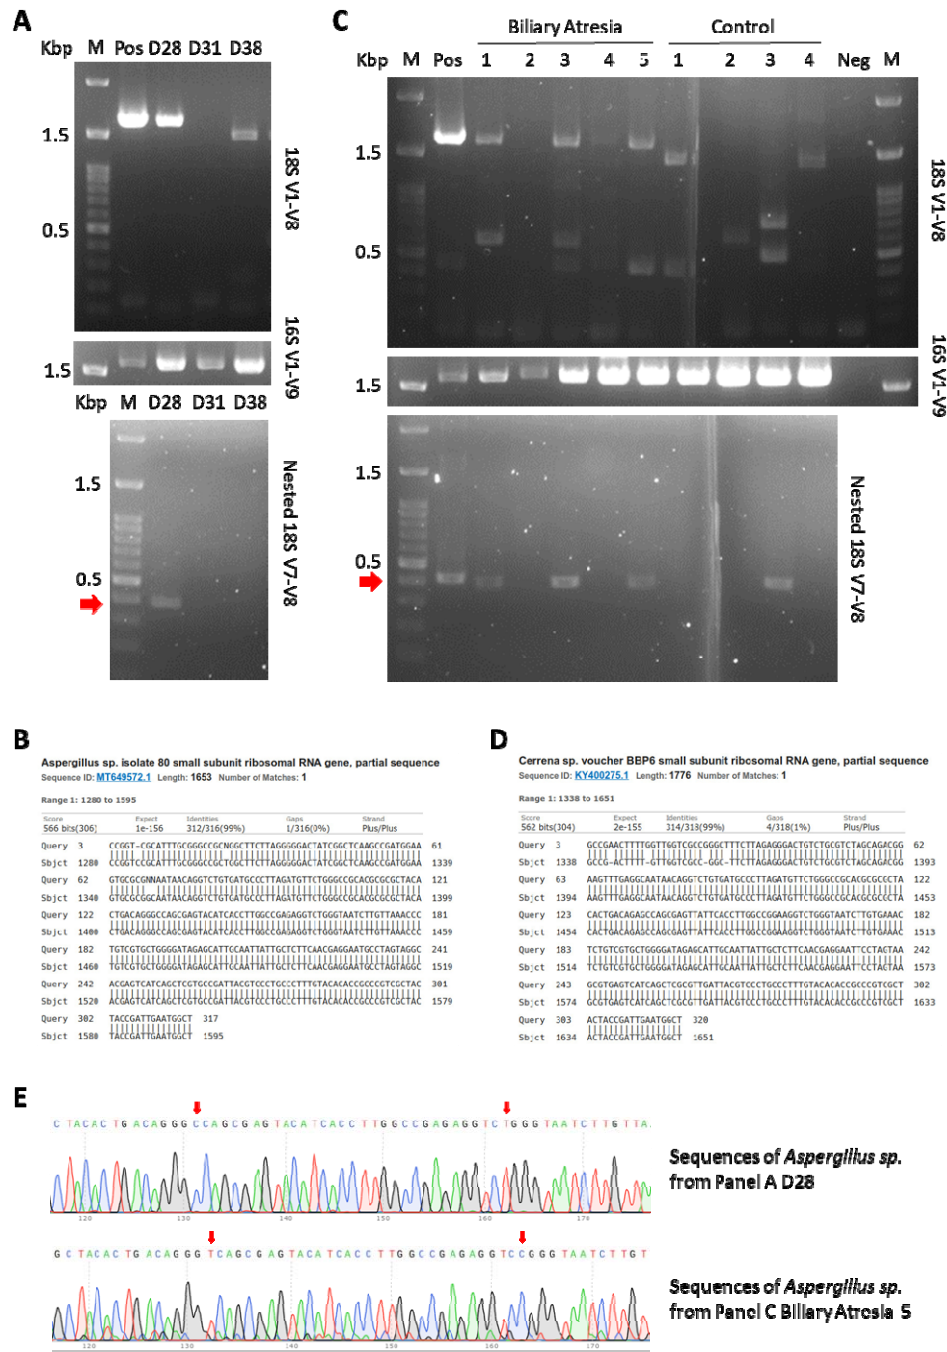

225

226 **Figure 2.** Molecular identification of fungal species with 18S ribosomal sequences.  
 227 A. 18S V1-V8 and semi-nested V7-V8 (red arrow) PCRs from fecal DNA of the  
 228 cholangitis case are shown. 16S V1-V9 PCR is used as internal control. B.  
 229 *Aspergillus sp.* is identified in stool from the index case. C. 18S V1-V8  
 230 and semi-nested V7-V8 (red arrow) PCRs were performed against fecal DNA from BA  
 231 patients and healthy controls. D. V7-V8 sequences of BA-1 match *Cerrena sp.* E.  
 232 *Aspergillus sp.* are distinct between the cholangitis case and BA-5.

233 **References**

- 234 1. Kasai, M., *Treatment of biliary atresia with special reference to hepatic*  
235 *porto-enterostomy and its modifications*. Prog Pediatr Surg, 1974. **6**: p. 5-52.
- 236 2. Yoeli, D., et al., *Primary vs. salvage liver transplantation for biliary atresia: A*  
237 *retrospective cohort study*. J Pediatr Surg, 2022. **57**(10): p. 407-413.
- 238 3. Altschul, S.F., et al., *Basic local alignment search tool*. J Mol Biol, 1990. **215**(3):  
239 p. 403-10.
- 240 4. Banos, S., et al., *A comprehensive fungi-specific 18S rRNA gene sequence*  
241 *primer toolkit suited for diverse research issues and sequencing platforms*.  
242 BMC Microbiol, 2018. **18**(1): p. 190.
- 243 5. Olsen, G.J., et al., *Microbial ecology and evolution: a ribosomal RNA approach*.  
244 Annu Rev Microbiol, 1986. **40**: p. 337-65.
- 245 6. Smit, E., et al., *Analysis of fungal diversity in the wheat rhizosphere by*  
246 *sequencing of cloned PCR-amplified genes encoding 18S rRNA and*  
247 *temperature gradient gel electrophoresis*. Appl Environ Microbiol, 1999. **65**(6):  
248 p. 2614-21.
- 249 7. Sayers, E.W., et al., *Database resources of the national center for*  
250 *biotechnology information*. Nucleic Acids Res, 2022. **50**(D1): p. D20-D26.
- 251 8. Limon, J.J., J.H. Skalski, and D.M. Underhill, *Commensal Fungi in Health and*  
252 *Disease*. Cell Host Microbe, 2017. **22**(2): p. 156-165.
- 253 9. Dufresne, P.J., et al., *High frequency of pathogenic Aspergillus species among*  
254 *nonsporulating moulds from respiratory tract samples*. Med Mycol, 2017.  
255 **55**(2): p. 233-236.
- 256 10. Erdman, S.H., B.J. Barber, and L.L. Barton, *Aspergillus cholangitis: A late*  
257 *complication after Kasai portoenterostomy*. J Pediatr Surg, 2002. **37**(6): p.  
258 923-5.
- 259 11. Hay, R.J., *Risk/benefit ratio of modern antifungal therapy: focus on hepatic*  
260 *reactions*. J Am Acad Dermatol, 1993. **29**(1): p. S50-4.
- 261
